# Supplementary material
Source: Springer Nature journal article supplement (https://www.springermedizin.de/resource/supplementary/12891_2013_2138_MOESM1_ESM.pdf/9509500)
Supplement: MOESM1 [file 9509500]

**Patient** (aged  $\geq 60$  years with a hip fracture)

**Care pathway**

**Historical group**

**ER**

Goal: maximum stay 120 minutes  
Nurse: care according to protocol  
Anesthesiologist: risk assessment  
Doctor: treatment and delirium attention protocol

Average waiting time 200 minutes  
No standardized procedure  
No attention for delirium

**Ward**

Patients clustered, standardized nursing protocol  
Evaluation by geriatrician  
Starting physical therapy and nutrition protocol

Different treatment protocols on wards  
Consultation of other specialists when necessary

**OR**

Fixed operating time 8.00 am after admission  
Fixed treatment protocol for every fracture

Operation when OR and team available  
No mutual treatment protocol

**Home**

Discharge procedure starts on admission  
Allocated places in nursing homes  
Multidisciplinary rehabilitation program

No standards for discharge planning  
No contacts with nursing homes

**Outpatient clinic**

Special hip fracture outpatient clinic  
End of pathway 6 months after operation

No special appointments  
No defined end of care
